# Supplementary material for: Effects of Straw Return and Moisture Condition on Temporal Changes of DOM Composition and Cd Speciation in Polluted Farmland Soil
Source: MDPI journal article supplement (doi:10.3390/ijerph191912128), 2022-09-25
Supplement: s1 [file s1]

## **Supplementary Information**

# **Effects of Straw Return and Moisture Condition on Temporal Changes of DOM Composition and Cd Speciation in Polluted Farmland Soil**

**Guang Yang <sup>1,2</sup>, Xiangyu Tang <sup>1,3,\*</sup>, Zhuo Guan <sup>1</sup> and Junfang Cui <sup>1</sup>**

<sup>1</sup> Key Laboratory of Mountain Surface Processes and Ecological Regulation, Institute of Mountain Hazards and Environment, Chinese Academy of Sciences, Chengdu 610041, China

<sup>2</sup> University of Chinese Academy of Sciences, Beijing 100049, China

<sup>3</sup> State Key Laboratory of Subtropical Silviculture, Zhejiang A&F University, Hangzhou 311300, China

\* Correspondence: xytang@imde.ac.cn

**Number of figures: 3**

**Number of tables: 2**

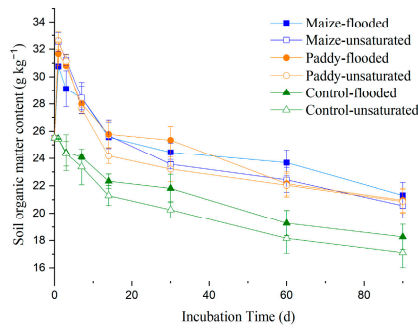

(a)

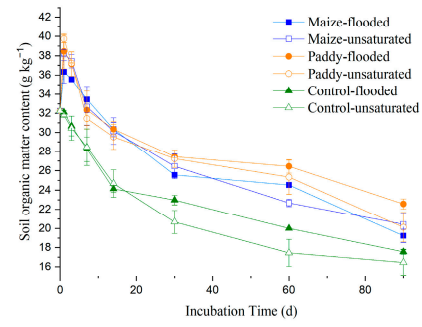

(b)

**Figure S1.** Temporal changes of organic matter content in the soils (collected from sites A (a) and B (b)) with or without thorough mixing with straw during laboratory incubation under different moisture conditions.

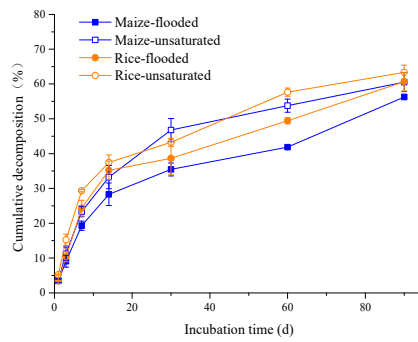

(a)

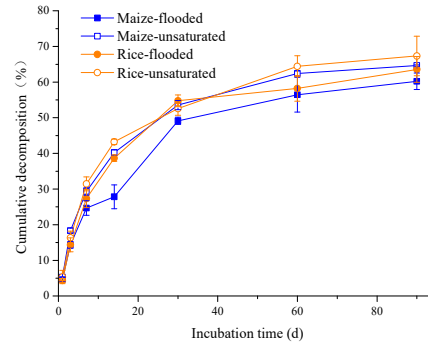

(b)

**Figure S2.** Temporal changes of cumulative decomposition of straws in mesh bags buried in the soils collected from sites A (a) and B (b) during laboratory incubation under different treatments.

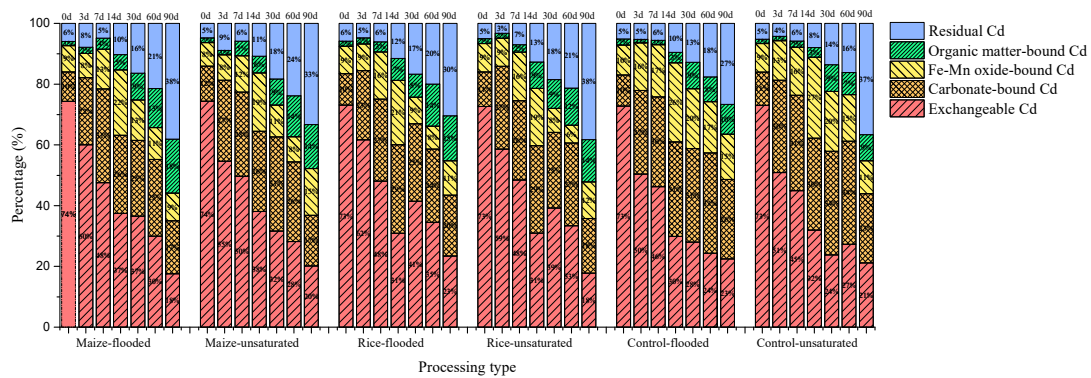

(a)

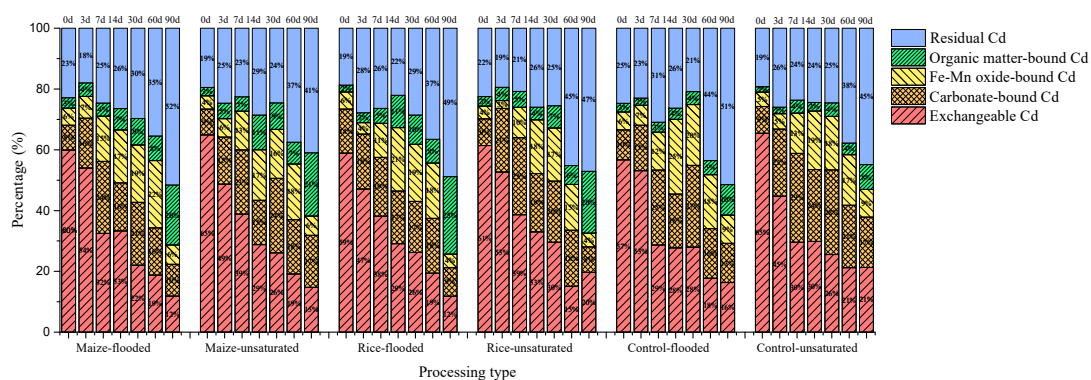

(b)

**Figure S3.** Temporal changes of Cd fraction distribution in the soils collected from sites A (a) and B (b) during laboratory incubation under different treatments.

**Table S1.** Fluorescence indices of dissolved organic matter in the soils collected from site A at different times during laboratory incubation under different treatments (mean±standard deviation).

| Incubation time (d) | Treatments          | HIX       | FI        | BIX       |
|---------------------|---------------------|-----------|-----------|-----------|
| 0                   | Maize-flooded       | 0.81±0.03 | 1.19±0.16 | 0.62±0.04 |
|                     | Maize-unsaturated   | 0.81±0.10 | 1.34±0.11 | 0.68±0.00 |
|                     | Paddy-flooded       | 0.87±0.09 | 1.18±0.09 | 0.57±0.01 |
|                     | Paddy-unsaturated   | 0.89±0.09 | 1.21±0.15 | 0.57±0.06 |
|                     | Control-flooded     | 0.92±0.07 | 1.16±0.11 | 0.54±0.07 |
|                     | Control-unsaturated | 0.89±0.04 | 1.18±0.12 | 0.65±0.10 |
| 3                   | Maize-flooded       | 0.81±0.06 | 1.33±0.02 | 0.75±0.10 |
|                     | Maize-unsaturated   | 0.86±0.03 | 1.32±0.20 | 0.69±0.09 |
|                     | Paddy-flooded       | 0.87±0.07 | 1.21±0.17 | 0.63±0.06 |
|                     | Paddy-unsaturated   | 0.85±0.07 | 1.23±0.08 | 0.65±0.08 |
|                     | Control-flooded     | 0.93±0.07 | 1.16±0.03 | 0.57±0.08 |
|                     | Control-unsaturated | 0.91±0.06 | 1.19±0.17 | 0.58±0.04 |
| 7                   | Maize-flooded       | 0.70±0.01 | 1.31±0.15 | 0.86±0.01 |
|                     | Maize-unsaturated   | 0.89±0.02 | 1.34±0.08 | 0.70±0.10 |
|                     | Paddy-flooded       | 0.83±0.08 | 1.29±0.10 | 0.68±0.07 |
|                     | Paddy-unsaturated   | 0.90±0.04 | 1.24±0.15 | 0.63±0.06 |
|                     | Control-flooded     | 0.95±0.10 | 1.15±0.13 | 0.55±0.01 |
|                     | Control-unsaturated | 0.94±0.02 | 1.17±0.12 | 0.58±0.02 |
| 14                  | Maize-flooded       | 0.75±0.02 | 1.28±0.20 | 0.72±0.07 |
|                     | Maize-unsaturated   | 0.90±0.02 | 1.24±0.07 | 0.63±0.01 |
|                     | Paddy-flooded       | 0.80±0.07 | 1.26±0.16 | 0.65±0.09 |
|                     | Paddy-unsaturated   | 0.90±0.10 | 1.23±0.13 | 0.62±0.08 |
|                     | Control-flooded     | 0.92±0.07 | 1.13±0.10 | 0.52±0.06 |
|                     | Control-unsaturated | 0.94±0.06 | 1.18±0.05 | 0.54±0.10 |
| 30                  | Maize-flooded       | 0.84±0.10 | 1.33±0.18 | 0.68±0.05 |
|                     | Maize-unsaturated   | 0.93±0.04 | 1.29±0.11 | 0.69±0.08 |
|                     | Paddy-flooded       | 0.84±0.07 | 2.04±0.13 | 0.65±0.06 |
|                     | Paddy-unsaturated   | 0.91±0.07 | 1.33±0.17 | 0.67±0.05 |
|                     | Control-flooded     | 0.90±0.07 | 1.18±0.00 | 0.57±0.04 |
|                     | Control-unsaturated | 0.95±0.09 | 1.17±0.16 | 0.57±0.04 |
| 60                  | Maize-flooded       | 0.82±0.10 | 1.18±0.08 | 0.64±0.06 |
|                     | Maize-unsaturated   | 0.88±0.08 | 1.22±0.02 | 0.66±0.09 |
|                     | Paddy-flooded       | 0.84±0.02 | 1.18±0.01 | 0.59±0.05 |
|                     | Paddy-unsaturated   | 0.88±0.02 | 1.15±0.02 | 0.53±0.07 |
|                     | Control-flooded     | 0.83±0.07 | 1.16±0.10 | 0.63±0.09 |
|                     | Control-unsaturated | 0.83±0.06 | 1.15±0.17 | 0.55±0.00 |
| 90                  | Maize-flooded       | 0.91±0.08 | 1.21±0.02 | 0.61±0.01 |
|                     | Maize-unsaturated   | 0.91±0.05 | 1.19±0.10 | 0.55±0.02 |

|                     |           |           |           |
|---------------------|-----------|-----------|-----------|
| Paddy-flooded       | 0.91±0.06 | 1.19±0.13 | 0.59±0.01 |
| Paddy-unsaturated   | 0.95±0.08 | 1.15±0.01 | 0.52±0.01 |
| Control-flooded     | 0.93±0.03 | 1.18±0.19 | 0.58±0.01 |
| Control-unsaturated | 0.95±0.04 | 1.16±0.06 | 0.54±0.02 |

---

**Table S2.** Fluorescence indexes of dissolved organic matter in the soils collected from site B at different times during laboratory incubation under different treatments (mean±standard deviation).

| Incubation Time (d) | Treatments          | HIX        | FI        | BIX       |
|---------------------|---------------------|------------|-----------|-----------|
| 0                   | Maize-flooded       | 0.86±0.07  | 1.17±0.03 | 0.61±0.04 |
|                     | Maize-unsaturated   | 0.81±0.05  | 1.26±0.03 | 0.65±0.04 |
|                     | Paddy-flooded       | 0.90±0.03  | 1.15±0.15 | 0.57±0.10 |
|                     | Paddy-unsaturated   | 0.89±0.02  | 1.19±0.16 | 0.61±0.05 |
|                     | Control-flooded     | 0.93±0.02  | 1.13±0.19 | 0.55±0.02 |
|                     | Control-unsaturated | 0.92±0.04  | 1.14±0.10 | 0.58±0.00 |
| 3                   | Maize-flooded       | 0.75±0.06  | 1.28±0.14 | 0.74±0.02 |
|                     | Maize-unsaturated   | 0.87± 0.06 | 1.30±0.03 | 0.71±0.05 |
|                     | Paddy-flooded       | 0.87±0.08  | 1.19±0.09 | 0.62±0.01 |
|                     | Paddy-unsaturated   | 0.90±0.04  | 1.21±0.11 | 0.62±0.08 |
|                     | Control-flooded     | 0.93±0.10  | 1.15±0.08 | 0.59±0.05 |
|                     | Control-unsaturated | 0.94±0.06  | 1.19±0.16 | 0.60±0.06 |
| 7                   | Maize-flooded       | 0.66±0.02  | 1.30±0.06 | 0.82±0.08 |
|                     | Maize-unsaturated   | 0.89±0.04  | 1.27±0.18 | 0.68±0.02 |
|                     | Paddy-flooded       | 0.81±0.08  | 1.25±0.14 | 0.73±0.04 |
|                     | Paddy-unsaturated   | 0.89±0.07  | 1.19±0.01 | 0.61±0.09 |
|                     | Control-flooded     | 0.94±0.05  | 1.15±0.00 | 0.58±0.04 |
|                     | Control-unsaturated | 0.94±0.04  | 1.17±0.02 | 0.60±0.06 |
| 14                  | Maize-flooded       | 0.83±0.03  | 1.17±0.12 | 0.60±0.06 |
|                     | Maize-unsaturated   | 0.88±0.03  | 1.22±0.13 | 0.65±0.03 |
|                     | Paddy-flooded       | 0.86±0.02  | 1.34±0.19 | 0.73±0.09 |
|                     | Paddy-unsaturated   | 0.90± 0.01 | 1.15±0.02 | 0.61±0.08 |
|                     | Control-flooded     | 0.92±0.09  | 1.16±0.19 | 0.58±0.03 |
|                     | Control-unsaturated | 0.94±0.10  | 1.17±0.17 | 0.59±0.04 |
| 30                  | Maize-flooded       | 0.85±0.03  | 1.20±0.02 | 0.64±0.04 |
|                     | Maize-unsaturated   | 0.91±0.07  | 1.27±0.20 | 0.72±0.08 |
|                     | Paddy-flooded       | 0.89±0.09  | 1.19±0.11 | 0.64±0.07 |
|                     | Paddy-unsaturated   | 0.93±0.06  | 1.18±0.14 | 0.61±0.01 |
|                     | Control-flooded     | 0.91±0.08  | 1.16±0.16 | 0.58±0.04 |
|                     | Control-unsaturated | 0.94±0.07  | 1.19±0.06 | 0.89±0.05 |
| 60                  | Maize-flooded       | 0.86±0.10  | 1.19±0.08 | 0.66±0.08 |
|                     | Maize-unsaturated   | 0.92±0.06  | 1.23±0.11 | 0.69±0.08 |
|                     | Paddy-flooded       | 0.87±0.04  | 1.12±0.15 | 0.58±0.09 |
|                     | Paddy-unsaturated   | 0.93±0.05  | 1.20±0.07 | 0.60±0.09 |
|                     | Control-flooded     | 0.93±0.06  | 1.10±0.13 | 0.59±0.03 |
|                     | Control-unsaturated | 0.86±0.02  | 1.14±0.13 | 0.56±0.08 |
| 90                  | Maize-flooded       | 0.91±0.10  | 1.18±0.04 | 0.62±0.07 |
|                     | Maize-unsaturated   | 0.94±0.05  | 1.15±0.10 | 0.54±0.03 |
|                     | Paddy-flooded       | 0.92±0.05  | 1.18±0.15 | 0.57±0.04 |

|                     |           |           |           |
|---------------------|-----------|-----------|-----------|
| Paddy-unsaturated   | 0.94±0.07 | 1.15±0.13 | 0.55±0.06 |
| Control-flooded     | 0.94±0.08 | 1.19±0.12 | 0.58±0.01 |
| Control-unsaturated | 0.94±0.05 | 1.16±0.10 | 0.55±0.04 |

---
